# Supplementary material for: Associations between Low-Carbohydrate Diets and Low-Fat Diets with Frailty in Community-Dwelling Aging Chinese Adults
Source: MDPI journal article supplement (doi:10.3390/nu15143084), 2023-07-09
Supplement: s1 [file s1]

**Table S1.** List of 28 variables used to construct frailty index

|    | Definition according to self-report, physical measurements, or both                                                                                                                                                                                                                                                                                  | Coding of variables                                                       |
|----|------------------------------------------------------------------------------------------------------------------------------------------------------------------------------------------------------------------------------------------------------------------------------------------------------------------------------------------------------|---------------------------------------------------------------------------|
| 1  | Self-reported diagnosis of hypertension by a doctor, self-reported use of antihypertension drugs, systolic blood pressure measured to be $\geq 140$ mm Hg, or diastolic blood pressure measured to be $\geq 90$ mm Hg                                                                                                                                | Yes=1; no=0                                                               |
| 2  | Self-reported diagnosis of heart disease by a doctor                                                                                                                                                                                                                                                                                                 | Yes=1; no=0                                                               |
| 3  | Self-reported diagnosis of stroke or transient ischaemic attack by a doctor                                                                                                                                                                                                                                                                          | Yes=1; no=0                                                               |
| 4  | Self-reported diagnosis of emphysema or chronic bronchitis by a doctor                                                                                                                                                                                                                                                                               | Yes=1; no=0                                                               |
| 5  | Self-reported diagnosis of tuberculosis by a doctor                                                                                                                                                                                                                                                                                                  | Yes=1; no=0                                                               |
| 6  | Self-reported diagnosis of asthma by a doctor                                                                                                                                                                                                                                                                                                        | Yes=1; no=0                                                               |
| 7  | Self-reported diagnosis of peptic ulcer by a doctor                                                                                                                                                                                                                                                                                                  | Yes=1; no=0                                                               |
| 8  | Self-reported diagnosis of gallstone disease or cholecystitis by a doctor                                                                                                                                                                                                                                                                            | Yes=1; no=0                                                               |
| 9  | Self-reported diagnosis of rheumatoid arthritis by a doctor                                                                                                                                                                                                                                                                                          | Yes=1; no=0                                                               |
| 10 | Self-reported diagnosis of fracture by a doctor                                                                                                                                                                                                                                                                                                      | Yes=1; no=0                                                               |
| 11 | Self-reported diagnosis of neurasthenia by a doctor                                                                                                                                                                                                                                                                                                  | Yes=1; no=0                                                               |
| 12 | Self-reported diagnosis of diabetes, fasting blood glucose measured to be $\geq 7.0$ mmol/L, or random blood glucose measured to be $\geq 11.1$ mmol/L                                                                                                                                                                                               | Yes=1; no=0                                                               |
| 13 | Self-reported diagnosis of cancer by a doctor                                                                                                                                                                                                                                                                                                        | Yes=1; no=0                                                               |
| 14 | Self-reported diagnosis of chronic kidney disease by a doctor                                                                                                                                                                                                                                                                                        | Yes=1; no=0                                                               |
| 15 | If you were walking on level ground with other healthy people of the same age, would you usually become short of breath or slow down because of chest discomfort?                                                                                                                                                                                    | Yes=1; no=0                                                               |
| 16 | During the past month, did you have any of the following for $\geq 3$ days per week: (1) taking $>30$ min to fall asleep after going to bed or waking up in the middle of the night; (2) waking up early and not being able to go back to sleep; or (3) having difficulty staying alert while at work, eating, or meeting people during the daytime? | Yes=1; no=0                                                               |
| 17 | How often do you have bowel movements each week?                                                                                                                                                                                                                                                                                                     | $<3$ times per week=1; other=0                                            |
| 18 | During the past 12 months, did you have pain or discomfort in your body lasting $\geq 3$ months that interfered with your life?                                                                                                                                                                                                                      | Yes=1; no=0                                                               |
| 19 | During the past 12 months, have you developed a frequent cough?                                                                                                                                                                                                                                                                                      | Yes, for $\geq 3$ months=1; yes, for $<3$ months=0.5; no=0                |
| 20 | Do you brush your teeth rarely or never, or have false teeth?                                                                                                                                                                                                                                                                                        | Yes=1; no=0                                                               |
| 21 | During the past 12 months, have you lost weight ( $\geq 2.5$ kg) despite not trying to intentionally lose weight?                                                                                                                                                                                                                                    | Yes=1; no=0                                                               |
| 22 | During the past 12 months, did you feel much sadder, or more depressed, than usual for $\geq 2$ weeks?                                                                                                                                                                                                                                               | Yes=1; no=0                                                               |
| 23 | How is your current general health status?                                                                                                                                                                                                                                                                                                           | Poor=1; fair=0.5; good=0.25; excellent=0                                  |
| 24 | Body-mass index ( $\text{kg}/\text{m}^2$ )                                                                                                                                                                                                                                                                                                           | $<18.5$ or $\geq 28.0$ =1; $\geq 24.0$ and $<28.0$ =0.50; $\geq 18.5$ and |

|    |                                                                                            |                                                                                                                                   |
|----|--------------------------------------------------------------------------------------------|-----------------------------------------------------------------------------------------------------------------------------------|
|    |                                                                                            | <24.0=0                                                                                                                           |
| 25 | Waist circumference (cm) to hip circumference ratio                                        | ≥0.95 for men or ≥0.90 for women=1; ≥0.90 and <0.95 for men or ≥0.85 and <0.90 for women=0.50; <0.90 for men or <0.85 for women=0 |
| 26 | Measured heart rate, beats per min                                                         | <60 or >100=1; ≥60 and ≤100=0                                                                                                     |
| 27 | Self-reported diagnosis of osteoporosis by a doctor                                        | Yes=1; no=0                                                                                                                       |
| 28 | How often do you participate in physical activity in your spare time in the past 12 months | <3 times per week=1; ≥3 times per week=0                                                                                          |

**Table S2.** Criteria for Determining the Low-Carbohydrate-Diet (LCD) Score

| Points               | Total Carbohydrate | Total Protein | Total Fat |
|----------------------|--------------------|---------------|-----------|
| Percentage of energy |                    |               |           |
| 0                    | >57.3              | <14.2         | <26.9     |
| 1                    | 55.4-58.7          | 13.6-14.8     | 26.0-28.6 |
| 2                    | 54.2-57.0          | 14.2-15.3     | 27.6-29.8 |
| 3                    | 53.1-55.7          | 14.7-15.7     | 28.7-30.7 |
| 4                    | 52.2-54.7          | 15.1-16.1     | 29.7-31.6 |
| 5                    | 51.2-53.7          | 15.5-16.4     | 30.6-32.5 |
| 6                    | 50.2-52.8          | 15.9-16.8     | 31.5-33.4 |
| 7                    | 49.0-51.8          | 16.3-17.3     | 32.3-34.3 |
| 8                    | 47.6-50.6          | 16.7-17.9     | 33.3-35.5 |
| 9                    | 45.5-49.3          | 17.3-18.7     | 34.5-37.4 |
| 10                   | <47.3              | >18.1         | >36.3     |

Note: LCD score is the sum of the scores for the three nutrients, ranging from 0 to 30.

**Table S3.** Criteria for Determining the Low-Fat-Diet(LFD) Score

| Points               | Total Fat | Total Carbohydrate | Total Protein |
|----------------------|-----------|--------------------|---------------|
| Percentage of energy |           |                    |               |
| 0                    | >36.3     | <47.3              | <14.2         |
| 1                    | 34.5-37.4 | 45.5-49.3          | 13.6-14.8     |
| 2                    | 33.3-35.5 | 47.6-50.6          | 14.2-15.3     |
| 3                    | 32.3-34.3 | 49.0-51.8          | 14.7-15.7     |
| 4                    | 31.5-33.4 | 50.2-52.8          | 15.1-16.1     |
| 5                    | 30.6-32.5 | 51.2-53.7          | 15.5-16.4     |
| 6                    | 29.7-31.6 | 52.2-54.7          | 15.9-16.8     |
| 7                    | 28.7-30.7 | 53.1-55.7          | 16.3-17.3     |
| 8                    | 27.6-29.8 | 54.2-57.0          | 16.7-17.9     |
| 9                    | 26.0-28.6 | 55.4-58.7          | 17.3-18.7     |
| 10                   | <26.9     | >57.3              | >18.1         |

Note: LFD score is the sum of the scores for the three nutrients, ranging from 0 to 30.

**Table S4.** Multivariate-adjusted odds ratio (ORs) and 95% confidence intervals (CIs) of pre-frail or frailty according to quartile of dietary fatty acid

|              | Pre-frailty OR (95%CI) |                  | Frailty OR (95%CI) |                  |
|--------------|------------------------|------------------|--------------------|------------------|
|              | Model 1                | Model 2          | Model 1            | Model 2          |
| <b>SFAs</b>  |                        |                  |                    |                  |
| Q1           | 1.00 (Ref)             | 1.00 (Ref)       | 1.00 (Ref)         | 1.00 (Ref)       |
| Q2           | 0.93 (0.80-1.08)       | 1.00 (0.84-1.19) | 1.01 (0.81-1.27)   | 1.27 (0.97-1.66) |
| Q3           | 1.00 (0.86-1.16)       | 1.05 (0.84-1.30) | 1.45 (1.17-1.80)   | 1.72 (1.25-2.37) |
| Q4           | 0.97 (0.84-1.13)       | 1.04 (0.80-1.34) | 0.86 (0.68-1.08)   | 1.16 (0.78-1.74) |
| P for trend  | 1.000                  | 1.00             | 0.999              | 1.00             |
| <b>MUFAs</b> |                        |                  |                    |                  |
| Q1           | 1.00 (Ref)             | 1.00 (Ref)       | 1.00 (Ref)         | 1.00 (Ref)       |
| Q2           | 0.89 (0.76-1.04)       | 0.93 (0.78-1.09) | 1.04 (0.83-1.29)   | 1.05 (0.82-1.34) |
| Q3           | 0.92 (0.79-1.08)       | 0.95 (0.78-1.15) | 0.78 (0.62-0.99)   | 0.76 (0.57-1.02) |
| Q4           | 1.01 (0.86-1.18)       | 1.06 (0.84-1.33) | 0.87 (0.69-1.10)   | 0.85 (0.60-1.19) |
| P for trend  | 0.507                  | 1.00             | 0.077              | 0.992            |
| <b>PUFAs</b> |                        |                  |                    |                  |
| Q1           | 1.00 (Ref)             | 1.00 (Ref)       | 1.00 (Ref)         | 1.00 (Ref)       |
| Q2           | 0.88 (0.76-1.02)       | 0.96 (0.83-1.12) | 0.92 (0.74-1.14)   | 0.98 (0.78-1.24) |
| Q3           | 0.99 (0.86-1.15)       | 0.95 (0.81-1.12) | 0.88 (0.71-1.10)   | 0.91 (0.71-1.17) |
| Q4           | 0.91 (0.79-1.06)       | 0.89 (0.75-1.05) | 0.85 (0.68-1.06)   | 0.94 (0.72-1.25) |
| P for trend  | 0.587                  | 0.999            | 0.159              | 0.998            |

Model 1: Age-adjusted. Model 2: adjusted for age (years), sex (male, female), educational status(primary school or lower, junior high school, senior high school or above), cigarette smoking(never smoked, smoking every day, occasional smoking), drinking(yes, no), physical activity (never, 1-2 times/week, 3-5 times/week, everyday), BMI(quartile) and total energy intake(quartile).

Abbreviation: SFAs saturated fatty acids; MUFAs monounsaturated fatty acids; PUFAs poly unsaturated fatty acids; Q1-Q4: Quartile 1-Quartile 4.

**Table S5.** Multivariate-adjusted odds ratio (ORs) and 95% confidence intervals (CIs) of pre-frail or frailty according to LCD and LFD by sex\*

|                  | <b>Male(n=3065)</b>        |                       | <b>Females(n=3349)</b>     |                       |
|------------------|----------------------------|-----------------------|----------------------------|-----------------------|
|                  | <b>Pre-frailty(n=1149)</b> | <b>Frailty(n=271)</b> | <b>Pre-frailty(n=1329)</b> | <b>Frailty(n=516)</b> |
|                  | <b>OR (95%CI)</b>          | <b>OR (95%CI)</b>     | <b>OR (95%CI)</b>          | <b>OR (95%CI)</b>     |
| <b>LCD score</b> |                            |                       |                            |                       |
| Q1               | 1.00 (Ref)                 | 1.00 (Ref)            | 1.00 (Ref)                 | 1.00 (Ref)            |
| Q2               | 0.85 (0.68-1.06)           | 0.63 (0.43-0.92)      | 0.91 (0.74-1.13)           | 0.66 (0.49-0.89)      |
| Q3               | 1.09 (0.88-1.35)           | 0.87 (0.60-1.22)      | 0.87 (0.70-1.08)           | 0.85 (0.63-1.14)      |
| Q4               | 0.91 (0.69-1.18)           | 0.90 (0.58-1.40)      | 0.62 (0.47-0.80)           | 0.65 (0.46-0.92)      |
| P for trend      | 0.934                      | 0.450                 | 0.002                      | 0.044                 |
| <b>LFD score</b> |                            |                       |                            |                       |
| Q1               | 1.00 (Ref)                 | 1.00 (Ref)            | 1.00 (Ref)                 | 1.00 (Ref)            |
| Q2               | 0.81 (0.65-1.01)           | 0.99 (0.67-1.48)      | 1.09 (0.88-1.35)           | 1.04 (0.76-1.42)      |
| Q3               | 0.85 (0.67-1.07)           | 1.15 (0.77-1.74)      | 1.03 (0.81-1.30)           | 1.36 (0.98-1.87)      |
| Q4               | 0.84 (0.66-1.07)           | 0.86 (0.56-1.34)      | 0.89 (0.67-1.14)           | 1.11 (0.78-1.56)      |
| P for trend      | 0.254                      | 0.866                 | 0.310                      | 0.148                 |

\*adjusted for age (years), educational status(primary school or lower, junior high school, senior high school or above), cigarette smoking(never smoked, smoking every day, occasional smoking), drinking(yes, no), physical activity (never, 1-2 times/week, 3-5 times/week, everyday), BMI(quartile) and total energy intake(quartile).

Abbreviation: LCD low-carbohydrate diets; LFD Low-fat-diets; Q1-Q4: Quartile 1-Quartile 4

A

| Group        | OR (95% CI)      | P for interaction |
|--------------|------------------|-------------------|
| Sex          |                  |                   |
| Male         | 0.90 (0.69-1.17) | 0.302             |
| Female       | 0.61 (0.47-0.79) |                   |
| Smoking      |                  |                   |
| No           | 0.73 (0.60-0.90) | 0.281             |
| Yes          | 0.70 (0.40-1.23) |                   |
| Drinkng      |                  |                   |
| No           | 0.74 (0.61-0.91) | 0.795             |
| Yes          | 0.91 (0.55-1.50) |                   |
| Age (y)      |                  |                   |
| <65          | 0.81 (0.59-1.10) | 0.142             |
| >=65         | 0.69 (0.55-0.87) |                   |
| BMI (kg/m2)  |                  |                   |
| <24.0        | 0.74 (0.55-0.99) | 0.260             |
| 24.0-27.9    | 0.73 (0.55-0.97) |                   |
| >=28.0       | 0.67 (0.42-1.04) |                   |
| FBG (mmol/L) |                  |                   |
| <5.6         | 0.73 (0.57-0.94) | 0.149             |
| 5.6-6.9      | 0.77 (0.56-1.07) |                   |
| >=7.0        | 0.93 (0.49-1.80) |                   |

C

| Group        | OR (95% CI)      | P for interaction |
|--------------|------------------|-------------------|
| Sex          |                  |                   |
| Male         | 0.86 (0.68-1.09) | 0.417             |
| Female       | 0.93 (0.72-1.18) |                   |
| Smoking      |                  |                   |
| No           | 0.89 (0.73-1.07) | 0.276             |
| Yes          | 0.90 (0.59-1.38) |                   |
| Drinkng      |                  |                   |
| No           | 0.73 (0.60-0.89) | 0.005             |
| Yes          | 1.50 (1.03-2.18) |                   |
| Age (y)      |                  |                   |
| <65          | 0.73 (0.43-1.24) | 0.095             |
| >=65         | 1.20 (0.87-1.64) |                   |
| BMI (kg/m2)  |                  |                   |
| <24.0        | 0.90 (0.68-1.19) | 0.098             |
| 24.0-27.9    | 0.84 (0.65-1.09) |                   |
| >=28.0       | 1.09 (0.72-1.67) |                   |
| FBG (mmol/L) |                  |                   |
| <5.6         | 0.76 (0.60-0.96) | 0.121             |
| 5.6-6.9      | 1.08 (0.81-1.45) |                   |
| >=7.0        | 1.14 (0.60-2.15) |                   |

B

| Group        | OR (95% CI)      | P for interaction |
|--------------|------------------|-------------------|
| Sex          |                  |                   |
| Male         | 0.89 (0.57-1.36) | 0.189             |
| Female       | 0.65 (0.46-0.92) |                   |
| Smoking      |                  |                   |
| No           | 0.66 (0.49-0.88) | 0.392             |
| Yes          | 1.65 (0.69-3.96) |                   |
| Drinkng      |                  |                   |
| No           | 0.82 (0.61-1.08) | <0.001            |
| Yes          | 0.30 (0.09-0.97) |                   |
| Age (y)      |                  |                   |
| <65          | 0.70 (0.52-0.95) | 0.631             |
| >=65         | 1.00 (0.81-1.13) |                   |
| BMI (kg/m2)  |                  |                   |
| <24.0        | 0.98 (0.59-1.63) | 0.113             |
| 24.0-27.9    | 0.65 (0.43-0.98) |                   |
| >=28.0       | 0.60 (0.35-1.03) |                   |
| FBG (mmol/L) |                  |                   |
| <5.6         | 0.87 (0.59-1.27) | 0.097             |
| 5.6-6.9      | 0.54 (0.32-0.90) |                   |
| >=7.0        | 0.81 (0.39-1.69) |                   |

D

| Group        | OR (95% CI)      | P for interaction |
|--------------|------------------|-------------------|
| Sex          |                  |                   |
| Male         | 0.88 (0.57-1.36) | 0.076             |
| Female       | 1.12 (0.80-1.58) |                   |
| Smoking      |                  |                   |
| No           | 0.99 (0.75-1.31) | 0.542             |
| Yes          | 0.87 (0.32-2.34) |                   |
| Drinkng      |                  |                   |
| No           | 0.96 (0.72-1.28) | 0.338             |
| Yes          | 0.80 (0.31-2.04) |                   |
| Age (y)      |                  |                   |
| <65          | 0.45 (0.28-0.73) | 0.526             |
| >=65         | 0.89 (0.65-1.22) |                   |
| BMI (kg/m2)  |                  |                   |
| <24.0        | 0.91 (0.62-1.33) | 0.779             |
| 24.0-27.9    | 0.94 (0.59-1.50) |                   |
| >=28.0       | 2.20 (1.02-4.76) |                   |
| FBG (mmol/L) |                  |                   |
| <5.6         | 0.66 (0.46-0.93) | 0.030             |
| 5.6-6.9      | 0.68 (0.39-1.08) |                   |
| >=7.0        | 1.03 (0.49-2.16) |                   |

Figure S1 Stratified analysis of LCD and LFD scores with pre-frail and frail by participants' characteristics. The odds ratios and 95% confidence intervals were calculated using logistic regression models after multivariate-adjusted. A: pre-frail with LCD; B: frail with LCD; C: pre-frail with LFD; D: frail with LFD.
